# Supplementary material for: PhosFox: a bioinformatics tool for peptide-level processing of LC-MS/MS-based phosphoproteomic data
Source: PubMed Central journal article supplement (PMC4098950; doi:10.1186/1477-5956-12-36), 2014-06-26
Supplement: 1477-5956-12-36-S7.pdf [file 1477-5956-12-36-S7.pdf]

Sequest  
search results

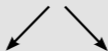

## Manual compilation

Phosphoprotein  
identifications

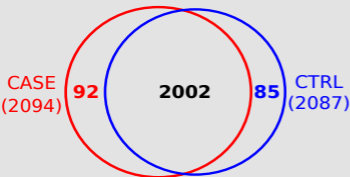

## PhosFox

Unique and common  
phosphopeptides

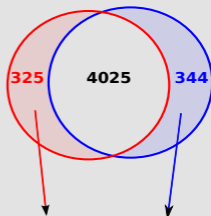

Uniquely and differently  
phosphorylated proteins

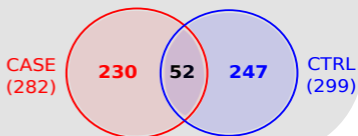

Figure S1
